# Supplementary material for: Nondestructive analysis of tumor-associated membrane protein MUC1 in living cells based on dual-terminal amplification of a DNA ternary complex
Source: PubMed Central journal article supplement (PMC7150497; doi:10.7150/thno.42951), 2020-03-15
Supplement: thnov10p4410s1.pdf [file thnov10p4410s1.pdf]

Supporting information

**Nondestructive analysis of tumor-associated membrane protein  
MUC1 in living cells based on dual-terminal amplification of a DNA  
ternary complex**

Xiaohao Liu<sup>1,#</sup>, Dongsheng Mao<sup>1,#</sup>, Guoli Deng<sup>2</sup>, Yuchen Song<sup>1</sup>, Fan Zhang<sup>1</sup>,

Shiqi Yang<sup>1</sup>, Genxi Li<sup>1</sup>, Feng Liu<sup>3,\*</sup>, Wei Cao<sup>4,\*</sup>, Xiaoli Zhu<sup>1,\*</sup>

<sup>1</sup>Center for Molecular Recognition and Biosensing, School of Life Sciences, Shanghai  
University, Shanghai 200444, P. R. China

<sup>2</sup>Plant Science Center, School of Life Sciences, Shanghai University, Shanghai  
200444, P. R. China

<sup>3</sup>Oncology Department, Shanghai Ninth People's Hospital, Shanghai Jiaotong  
University, School of Medicine, Shanghai 201900, P. R. China

<sup>4</sup>Department of Oral and Maxillofacial-Head and Neck Oncology, Shanghai Ninth  
People's Hospital, Shanghai Jiao Tong University, School of Medicine, Shanghai  
200011, P. R. China

<sup>#</sup>These authors contributed equally in this work

---

\*Corresponding authors.

E-mail addresses: liufeng@shsmu.edu.cn (F. Liu), caowei561521@shsmu.edu.cn (W. Cao),  
xiaolizhu@shu.edu.cn (X. Zhu).

**Table S1.** Details of DNA oligonucleotide sequences.

| Name                | Sequence (5'→3')                                                | Modification     |
|---------------------|-----------------------------------------------------------------|------------------|
| Apt-Pri             | GCAGTTGATCCTTTGGATACCCTGGACCTCACGACCAT<br>TCTGC                 | 5'-Cy5           |
| Ass-Pri             | CTAACAATTATCACTGGGTCGTGAGGT                                     |                  |
| Loop                | GTACGGCAGAATCAGTGATAATTGTTAGAAGAAAAA<br>AAATCCCAACCCGCCCTACCCTA | Cyclization      |
| Molecular<br>Beacon | CGCTCTCCCAACCCGCCCTAGAGCG                                       | 5'-FAM<br>3'-BHQ |
| mApt-Pri            | ATCTGTATTCATGTATTCTTGTATTACCTCACGACCATT<br>CTGC                 | 5'-Cy5           |
| MUC1 mimic          | ATCCAAAGGATCAACTGCCGTAC                                         | 5'-FAM           |

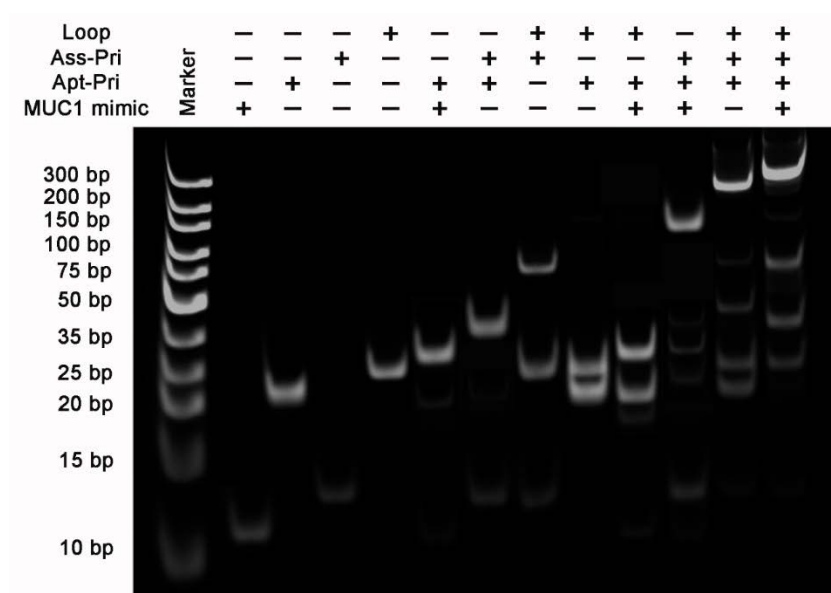

**Figure S1.** Polyacrylamide gel electrophoretic patterns of the assembly of DNA ternary complex.

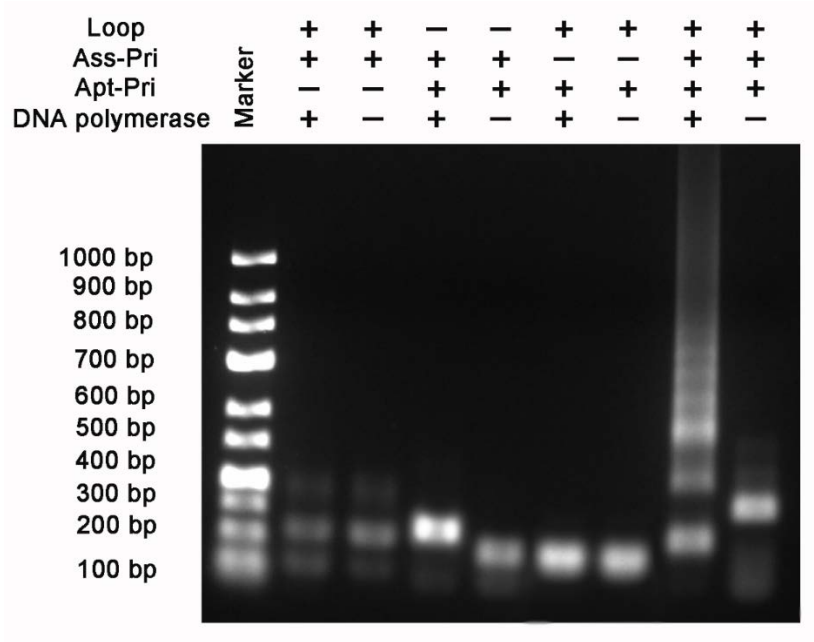

**Figure S2.** Agarose gel electrophoretic patterns of RCA products with different structures.

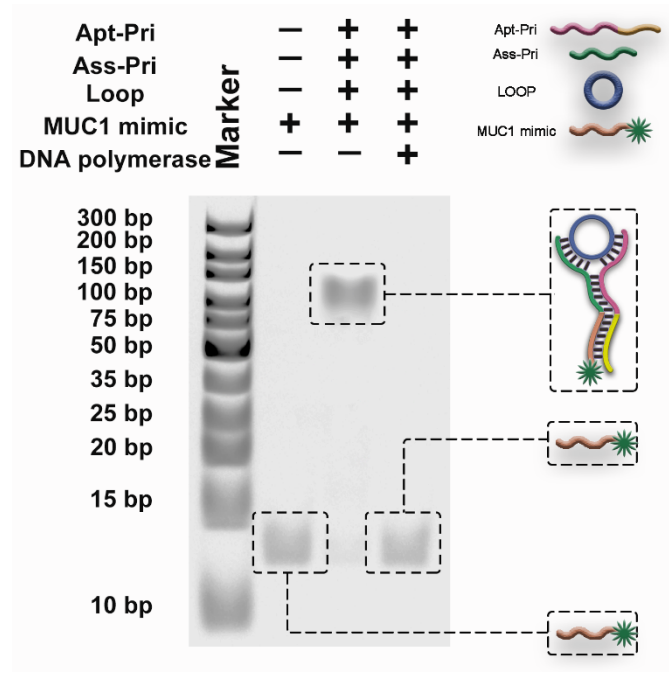

**Figure S3.** Agarose gel electrophoresis patterns of the release of MUC1 mimic. (Lane 2 to lane 4 are not stained with nucleic acid dye).

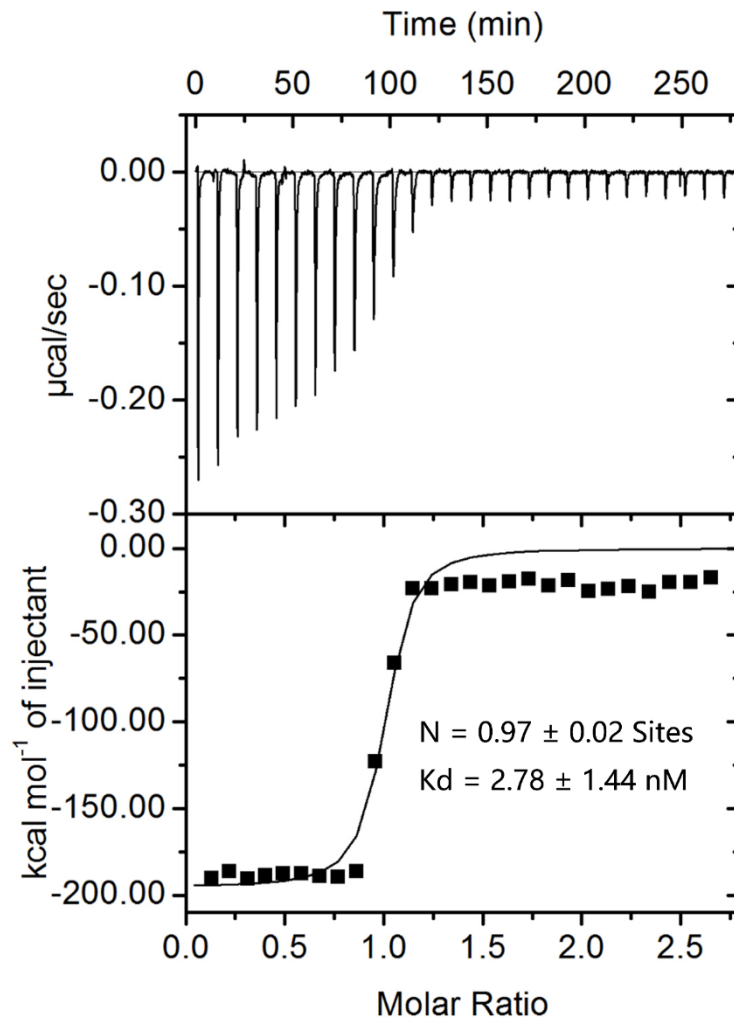

**Figure S4.** Isothermal titration calorimetry (ITC) analysis of the dissociation equilibrium constant ( $K_d$ ) of Apt-Pri and MUC1 mimic.

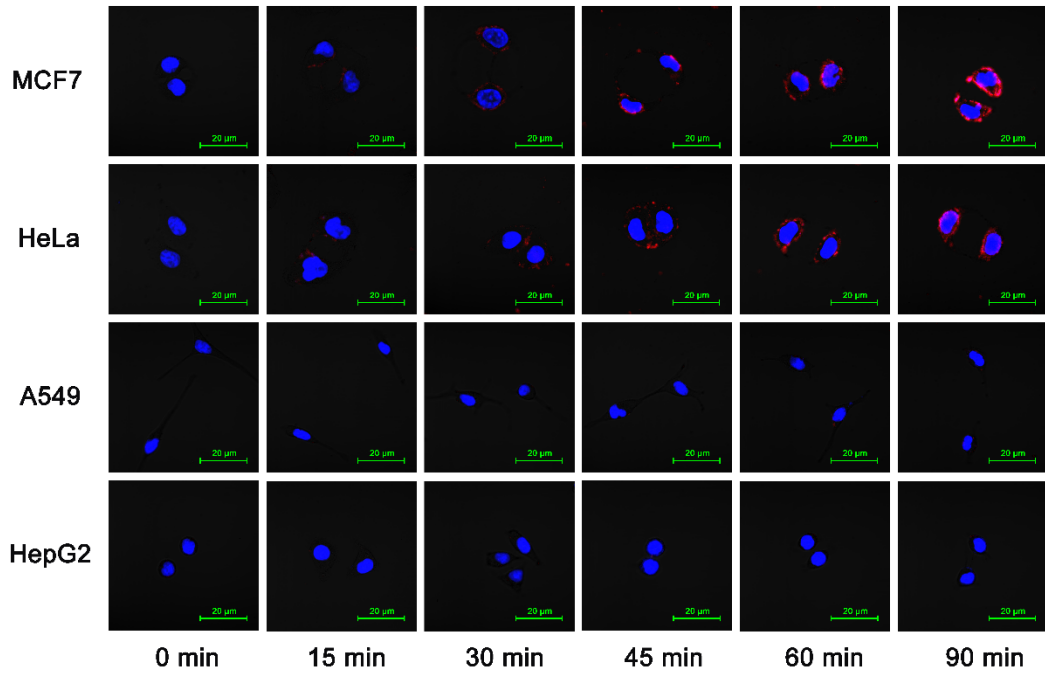

**Figure S5.** Confocal laser scanning microscopy images of MUC1 labeled with Apt-Pri by various incubated times.

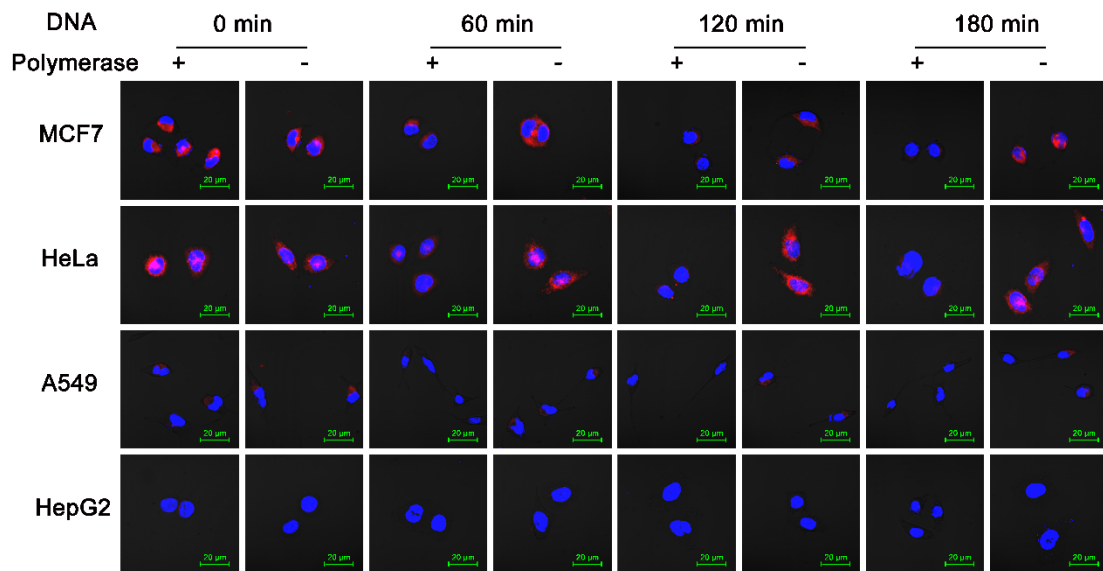

**Figure S6.** Confocal laser scanning microscope images of Apt-Pri labeled on MUC1 during DTA.

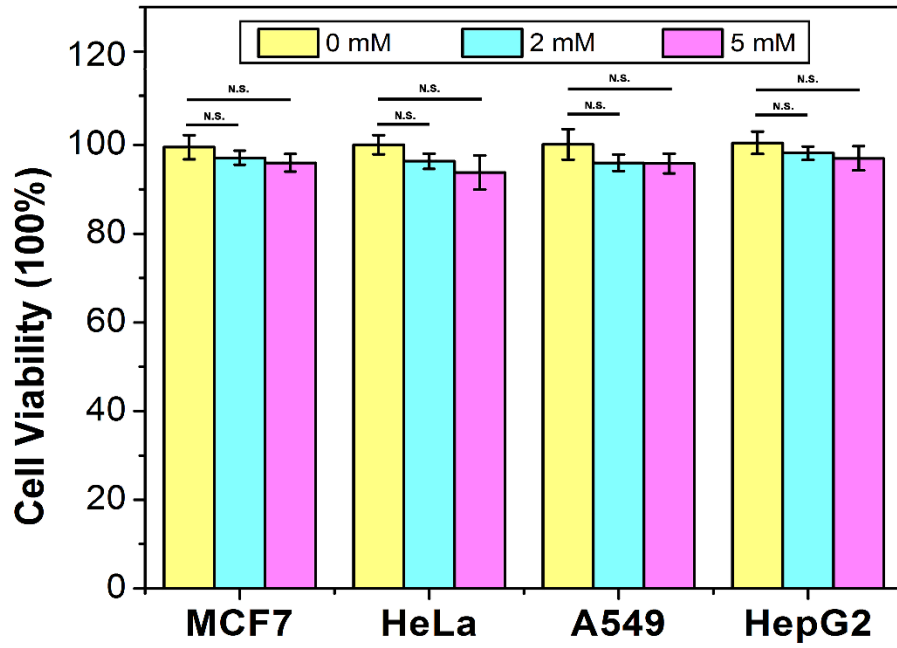

**Figure S7.** CCK-8 analysis of cell viability. The cells had been pre-treated with various concentrations of benzyl- $\alpha$ -GalNAc for 60 h. The data represent the mean  $\pm$  SD (error bars) of triplicate experiments. N.S., no significance. \*,  $p < 0.05$ . \*\*,  $p < 0.01$ . \*\*\*,  $p < 0.001$ .

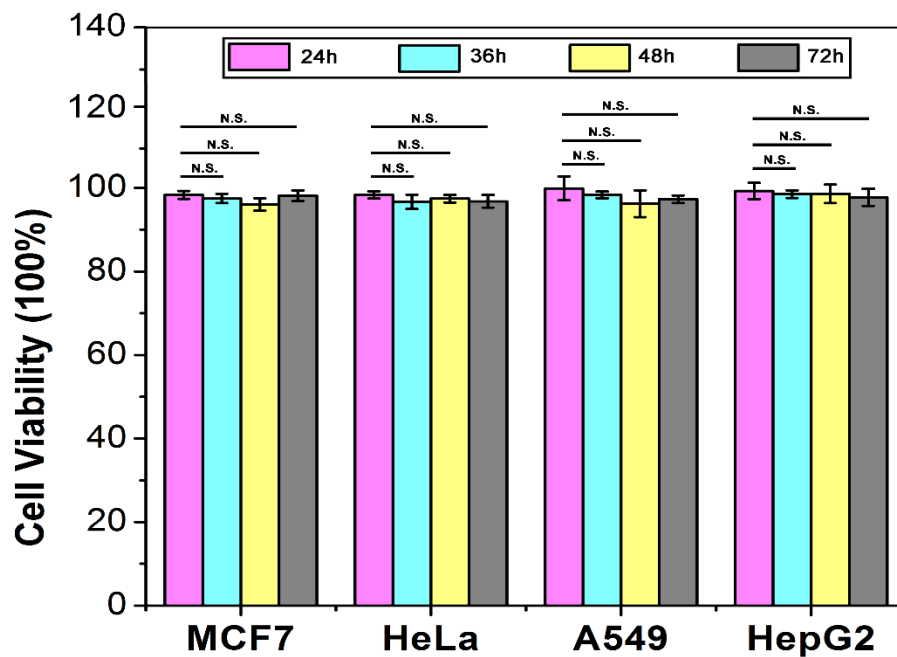

**Figure S8.** CCK-8 analysis of cell viability. The cells had been pre-analyzed by DTA with two rounds followed by culture for 24-72 hours. The data represent the mean  $\pm$  SD (error bars) of triplicate experiments. N.S., no significance. \*,  $p < 0.05$ . \*\*,  $p < 0.01$ . \*\*\*,  $p < 0.001$ .

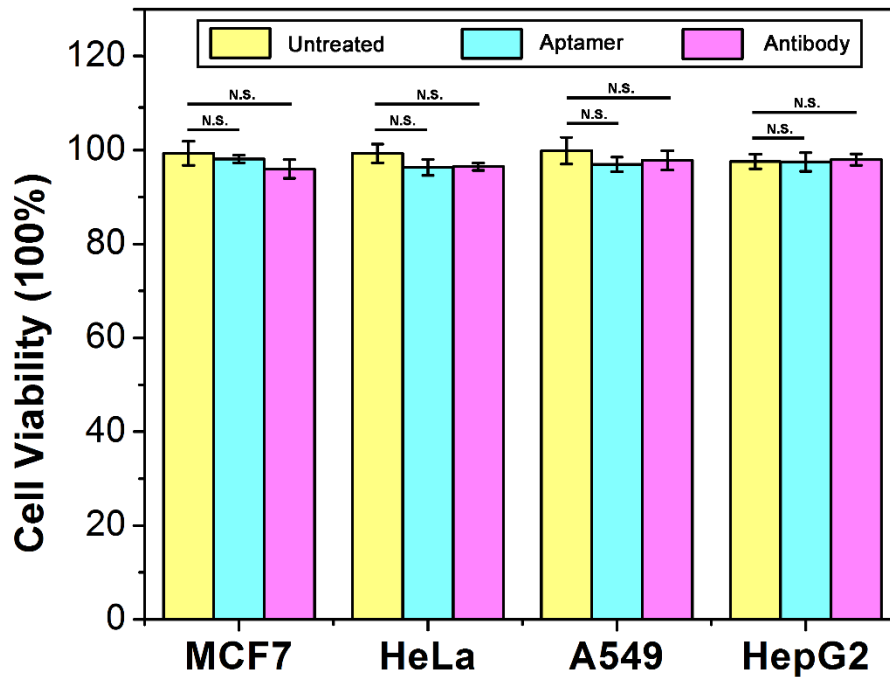

**Figure S9.** CCK-8 analysis of cell viability. The cells had been pre-incubated with aptamer (Apt-Pri, 150 nM) or Anti-MUC1 antibody (1:500 dilution) for 72 hours. The data represent the mean  $\pm$  SD (error bars) of triplicate experiments. N.S., no significance. \*,  $p < 0.05$ . \*\*,  $p < 0.01$ . \*\*\*,  $p < 0.001$ .

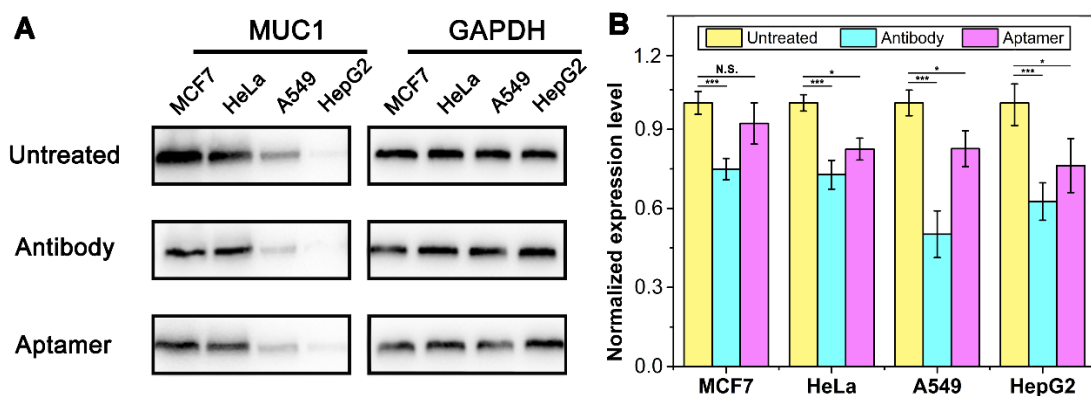

**Figure S10.** Effect of aptamer and antibody on MUC1 expression in different cell lines.

(A) Western blot results and (B) normalized expression level of MUC1 after pre-incubated with aptamer (Apt-Pri, 150 nM) or anti-MUC1 antibody (1:500 dilution) for



72 hours. Normalized data was derived from the gray value of western blot results in Figure S10A. The data represent the mean  $\pm$  SD (error bars) of triplicate experiments.

N.S., no significance. \*,  $p < 0.05$ . \*\*,  $p < 0.01$ . \*\*\*,  $p < 0.001$ .
